# Supplementary material for: Newly synthesized palladium(ii) complexes with dialkyl esters of (S,S)-propylenediamine-N,N′-di-(2,2′-di-(4-hydroxy-benzil))acetic acid: in vitro investigation of biological activities and HSA/DNA binding
Source: Royal Society of Chemistry journal article supplement (doi:10.1039/d4dt00659c), 2024-01-01
Supplement: d4dt00659c1.pdf [file d4dt00659c1.pdf]

**Newly synthesized palladium(II) complexes with dialkyl esters of (*S,S*)-propylenediamine-*N,N'*-di-(2,2'-di-(4-hydroxy-benzil)) acetic acid: *In vitro* investigation of biological activities and HSA/DNA binding**

Kemal Ćorović<sup>af</sup>, Danijela Lj. Stojković<sup>b1</sup>, Đorđe S. Petrović<sup>c</sup>, Sandra S. Jovičić Milić<sup>b</sup>, Maja B. Đukić<sup>c</sup>, Ivana D. Radojević<sup>d</sup>, Ivana Raković<sup>e</sup>, Milena Jurisević<sup>f,g</sup>, Nevena Gajović<sup>g</sup>, Marina Jovanović<sup>g,h</sup>, Jovana Marinković<sup>g</sup>, Ivan Jovanović<sup>g</sup>, Bojan Stojanović<sup>g,i</sup>

<sup>a</sup>Community health center Tutin, Department of Emergency medicine, Bogoljuba Ćukića 12, 36320 Tutin, Republic of Serbia

<sup>b</sup>University of Kragujevac, Institute for Information Technologies, Department of Science, Jovana Cvijića bb, 34000 Kragujevac, Republic of Serbia

<sup>c</sup>University of Kragujevac, Faculty of Science, Department of Chemistry, Radoja Domanovića 12, 34000 Kragujevac, Republic of Serbia

<sup>d</sup>University of Kragujevac, Faculty of Science, Department of Biology and Ecology, Radoja Domanovića 12, 34000 Kragujevac, Republic of Serbia

<sup>e</sup>University of Kragujevac, Faculty of Medical Sciences, Department of Infectious diseases, Svetozara Markovića 69, 34000 Kragujevac, Republic of Serbia

<sup>f</sup>University of Kragujevac, Faculty of Medical Sciences, Department of Pharmacy, Svetozara Markovića 69, 34000 Kragujevac, Republic of Serbia

<sup>g</sup>University of Kragujevac, Faculty of Medical Sciences, Center for Molecular Medicine and Stem Cell Research, Svetozara Markovića 69, 34000 Kragujevac, Republic of Serbia

<sup>h</sup>University of Kragujevac, Faculty of Medical Sciences, Department of Otorinolaringology, Svetozara Markovića 69, 34000 Kragujevac, Republic of Serbia

<sup>i</sup>University of Kragujevac, Faculty of Medical Sciences, Department of Surgery, Svetozara Markovića 69, 34000 Kragujevac, Republic of Serbia

---

<sup>1</sup>Corresponding author.

E-mail address: [danijela.stojkovic@kg.ac.rs](mailto:danijela.stojkovic@kg.ac.rs)

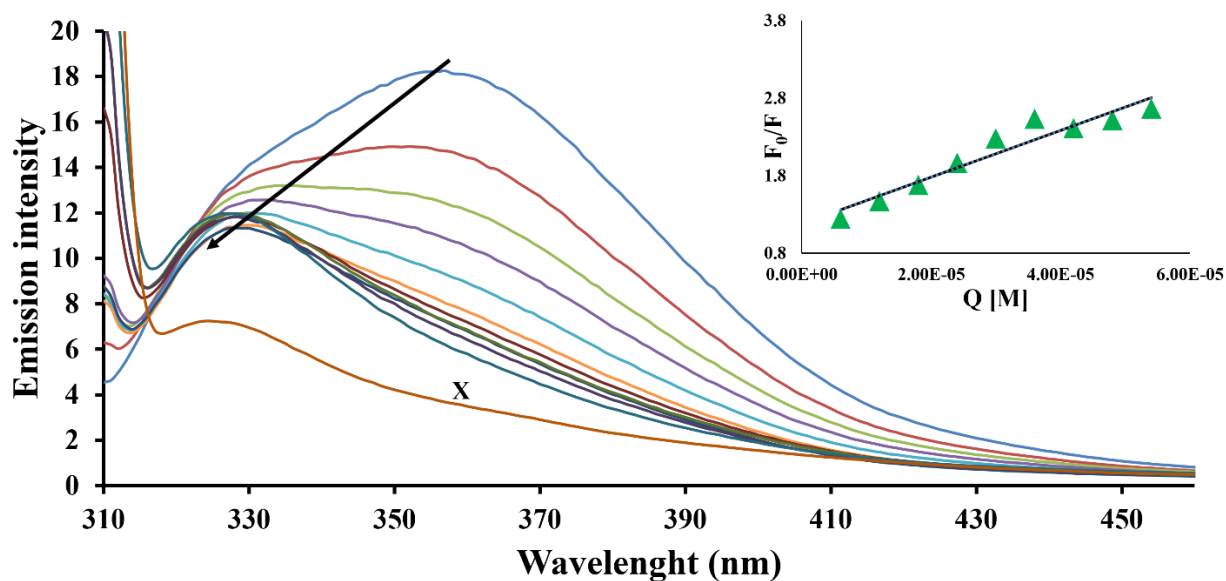

**Fig. S1** Fluorescence emission spectra of HSA in the presence of various concentrations of **C2** ( $T = 298 \text{ K}$ ,  $\text{pH} = 7.4$ ).  $[\text{HSA}] = 2 \mu\text{M}$ ;  $[\text{C2}] = 0\text{-}80 \mu\text{M}$ . The inset shows the Stern–Volmer plots of the fluorescence quenching of HSA by  $[\text{C2}]$ . x represents  $80 \mu\text{M} [\text{C2}]$  only.

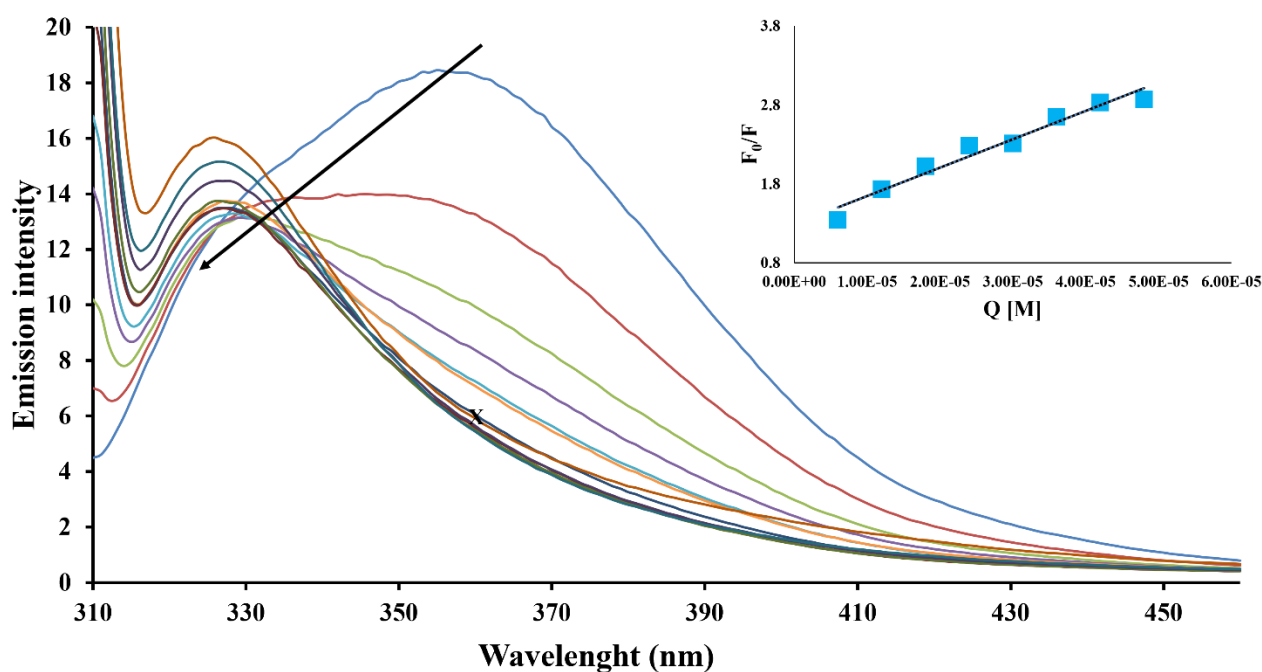

**Fig. S2** Fluorescence emission spectra of HSA in the presence of various concentrations of **C3** ( $T = 298 \text{ K}$ ,  $\text{pH} = 7.4$ ).  $[\text{HSA}] = 2 \mu\text{M}$ ;  $[\text{C3}] = 0\text{-}80 \mu\text{M}$ . The inset shows the Stern–Volmer plots of the fluorescence quenching of HSA by  $[\text{C3}]$ . x represents  $80 \mu\text{M} [\text{C3}]$  only.

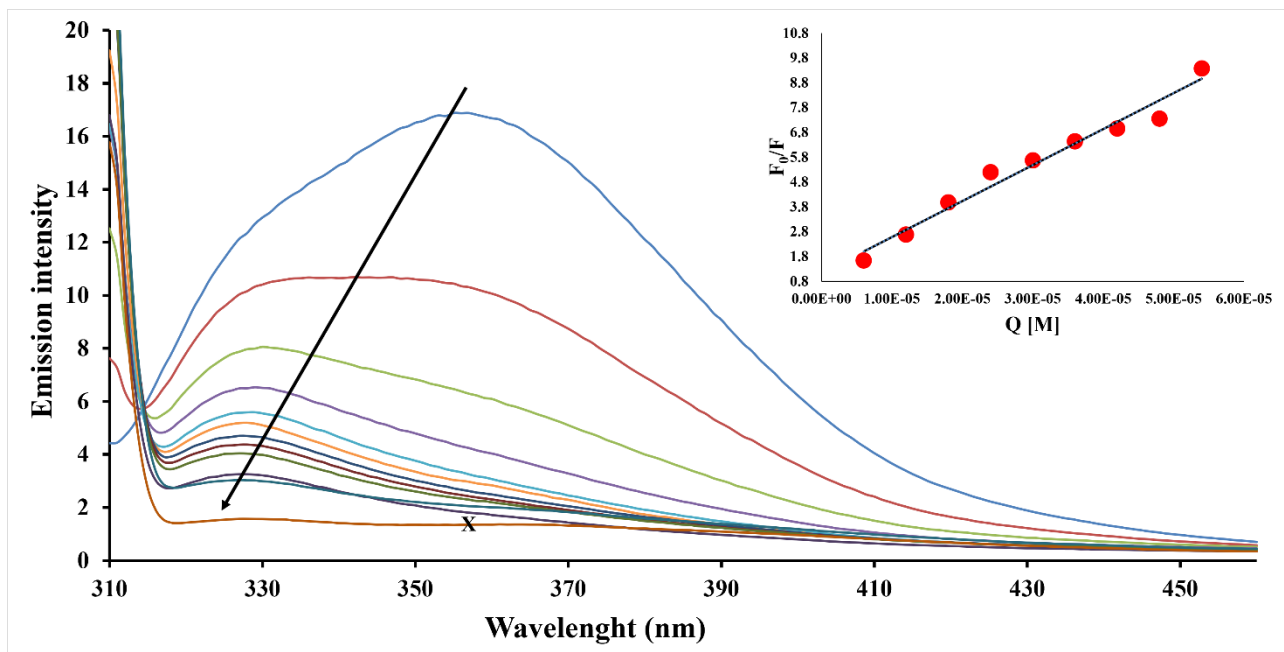

**Fig. S3** Fluorescence emission spectra of HSA in the presence of various concentrations of C4 (T = 298 K, pH = 7.4). [HSA] = 2  $\mu$ M; [C4] = 0-80  $\mu$ M. The inset shows the Stern–Volmer plots of the fluorescence quenching of HSA by [C4]. x represents 80  $\mu$ M [C4] only.

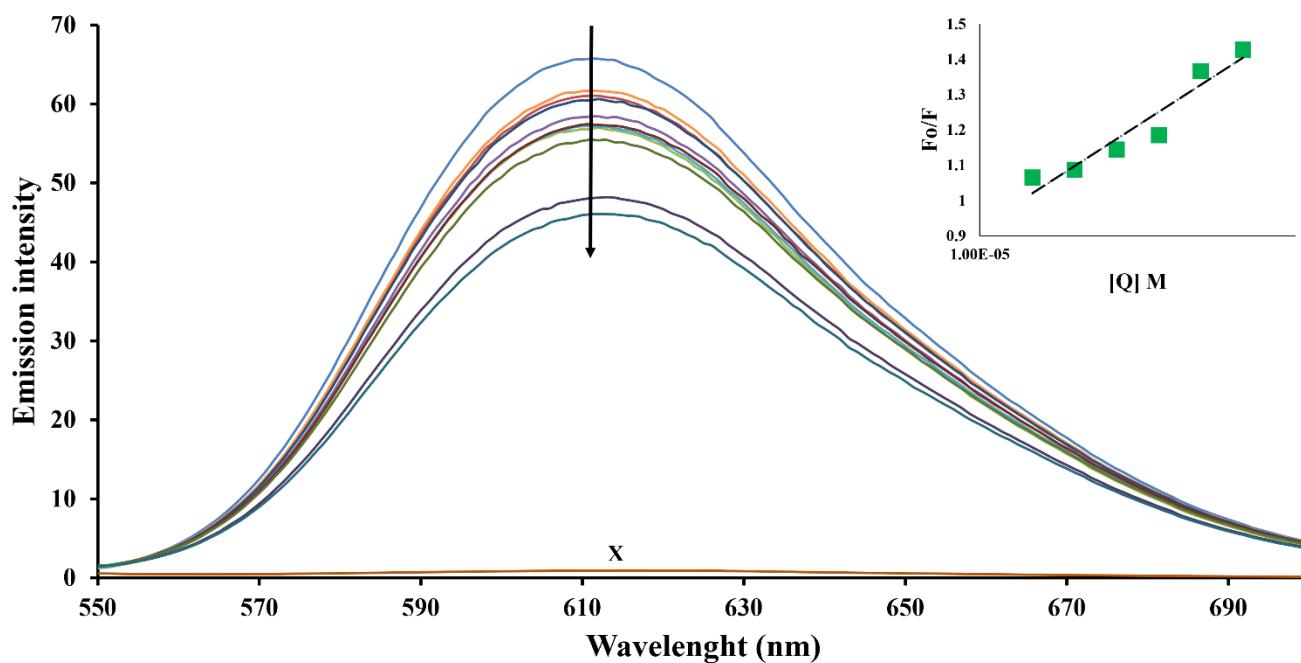

**Fig. S4** The fluorescence emission spectra of EB-DNA in the absence and presence of increasing amounts of C2 (T = 298 K, pH = 7.4). [DNA] =  $2.27 \times 10^{-5}$  M; [EB] =  $2 \times 10^{-5}$  M; [C2] = 0-6  $\times 10^{-5}$  M; The inset shows the plot of  $F_0/F$  vs. [Q]. X represents  $6 \times 10^{-5}$  [C2] only.

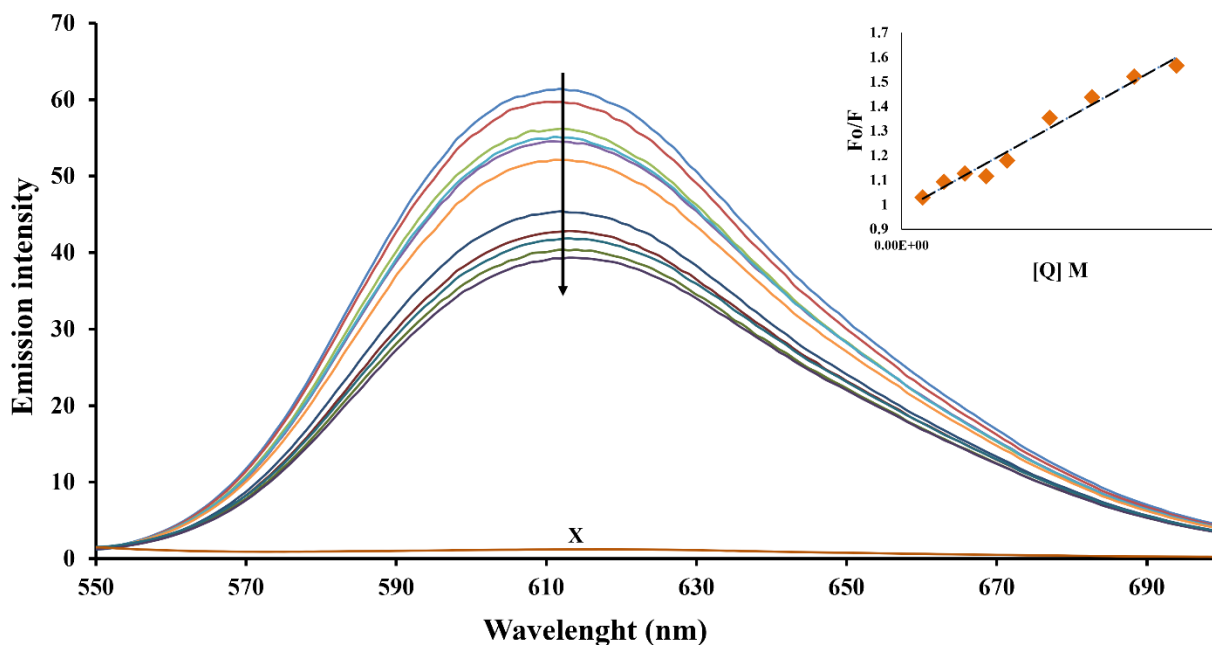

**Fig. S5** The fluorescence emission spectra of EB–DNA in the absence and presence of increasing amounts of **C3** (T = 298 K, pH = 7.4). [DNA] =  $2.27 \times 10^{-5}$  M; [EB] =  $2 \times 10^{-5}$  M; [C3] =  $0-6 \times 10^{-5}$  M; The inset shows the plot of  $F_0/F$  vs. [Q]. X represents  $6 \times 10^{-5}$  [C3] only.

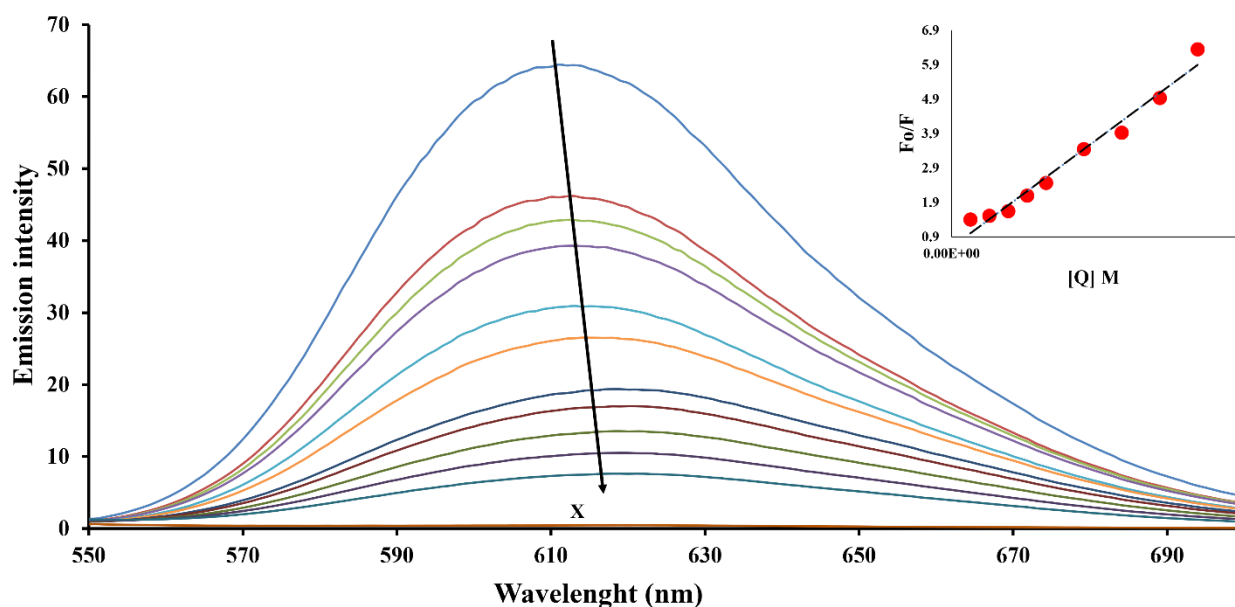

**Fig. S6** The fluorescence emission spectra of EB–DNA in the absence and presence of increasing amounts of **C4** (T = 298 K, pH = 7.4). [DNA] =  $2.27 \times 10^{-5}$  M; [EB] =  $2 \times 10^{-5}$  M; [C4] =  $0-6 \times 10^{-5}$  M; The inset shows the plot of  $F_0/F$  vs. [Q]. X represents  $6 \times 10^{-5}$  [C4] only.

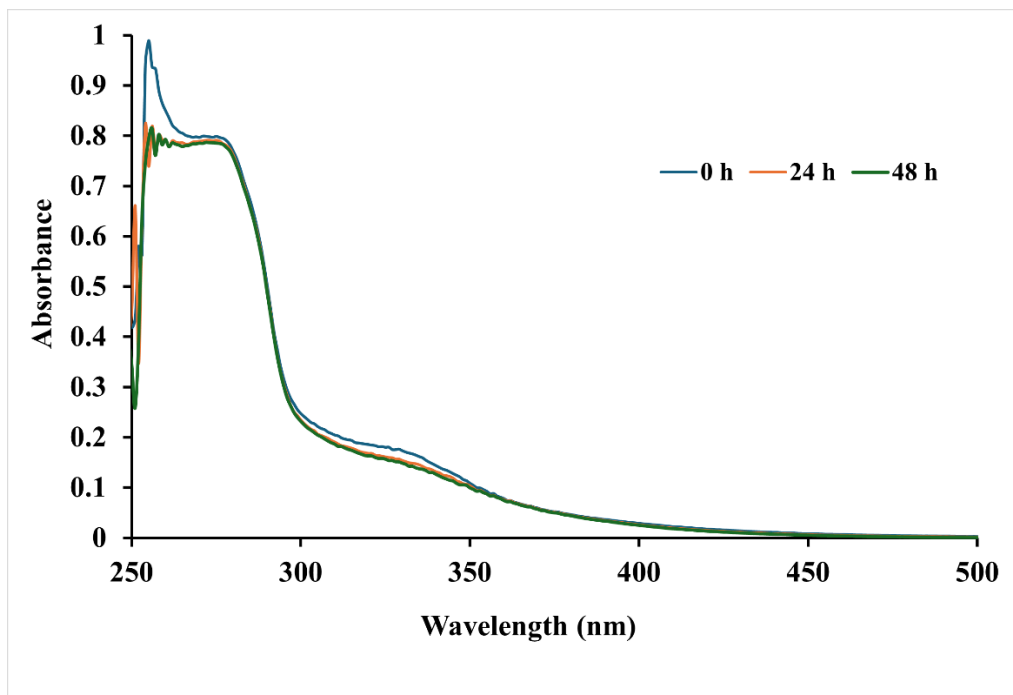

Fig. S7 Stability of the C1 complex in DMSO during 0, 24, and 48 hours

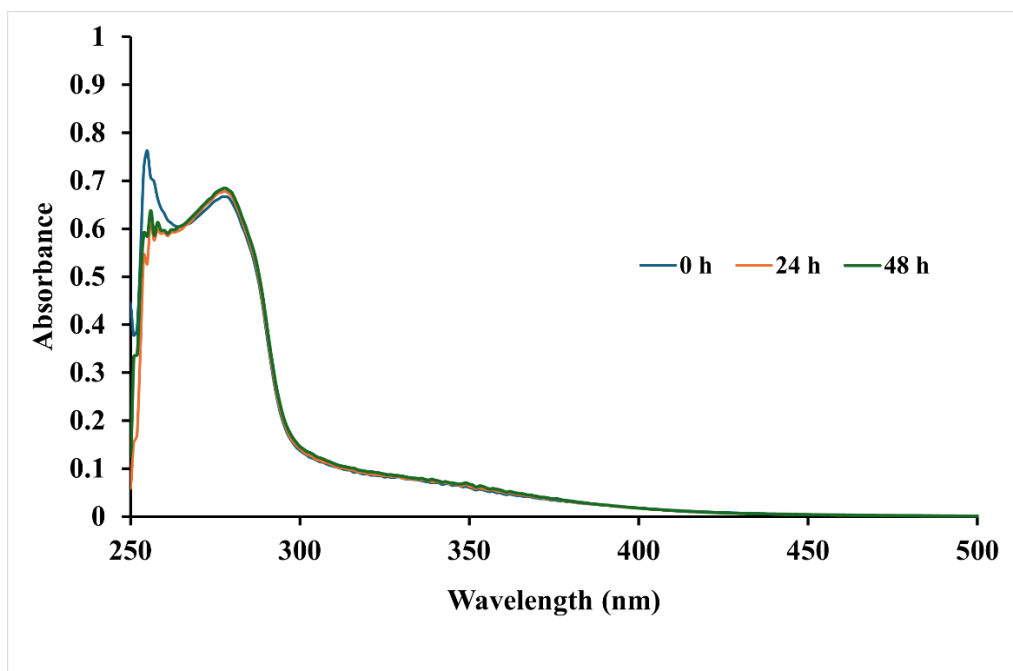

Fig. S8 Stability of the C2 complex in DMSO during 0, 24, and 48 hours

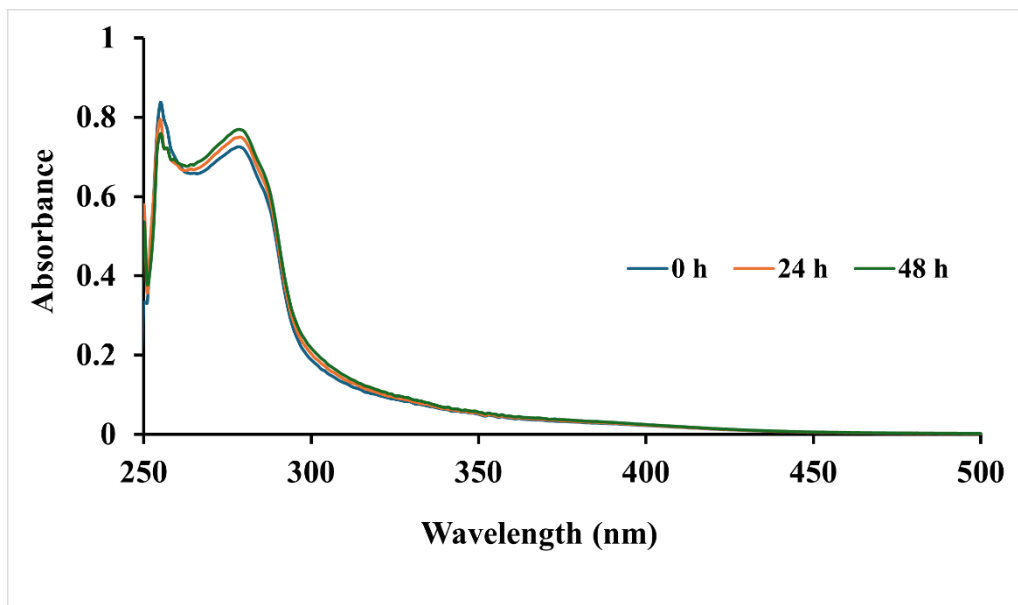

Fig. S9 Stability of the C3 complex in DMSO during 0, 24, and 48 hours

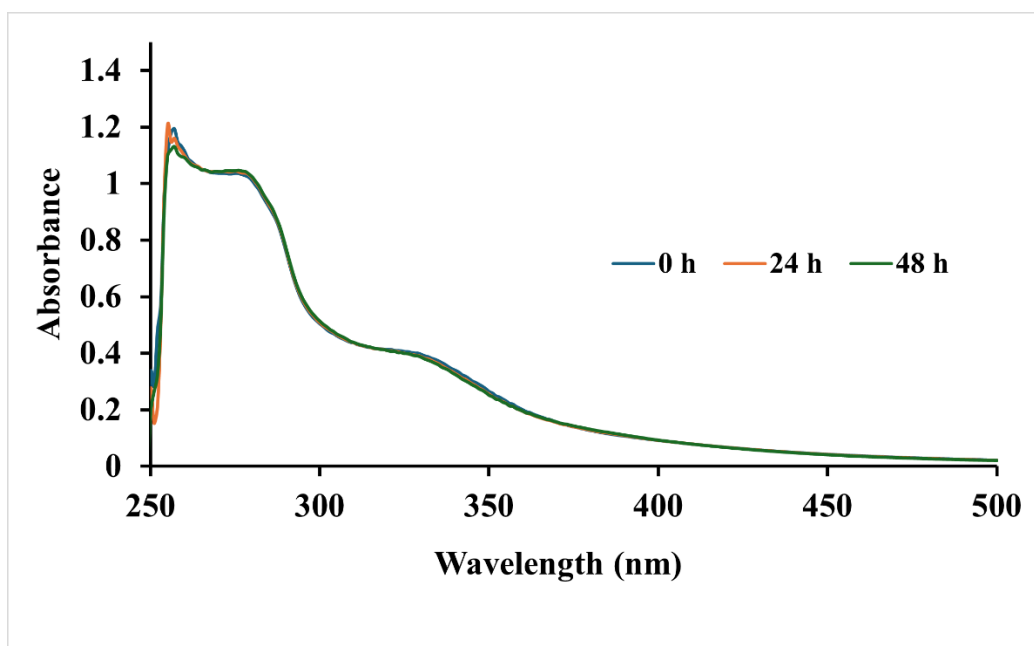

Fig. S10 Stability of the C4 complex in DMSO during 0, 24, and 48 hours

Values of conductometric measurements: C1 Mol. Cond. (DMSO,  $\Omega^{-1} \text{ cm}^2 \text{ mol}^{-1}$ ) = 15.3; C2 Mol. Cond. (DMSO,  $\Omega^{-1} \text{ cm}^2 \text{ mol}^{-1}$ ) = 13.8; C3 Mol. Cond. (DMSO,  $\Omega^{-1} \text{ cm}^2 \text{ mol}^{-1}$ ) = 10.2; C4 Mol. Cond. (DMSO,  $\Omega^{-1} \text{ cm}^2 \text{ mol}^{-1}$ ) = 8.7. Based on the measured values, we come to the conclusion that the complexes are neutral.
